# Supplementary material
Source: publisher figshare collection journal article supplement (https://acs.figshare.com/ndownloader/files/18022199)
Supplement: Supplementary file 1 [file 18022199]

## Sheet: Sheet1
cathode layer	18				mg cm-2			mass ratio (cathode/anode)	2.8
anode layer	18			cathode mass loading	10
separator layer	18			anode mass loading	3.57143
cathode current collector	10
anode currebt collector	9
	cm2
area of one layer	10
												cathode AM ratio	0.9
												anode AM ratio	0.95
	mg	g			g cm-3				cm-3				g			cm-1
cathode mass (AM)	1800	1.8		cathode density (AM)	0.65			cathode volume (only AM)	2.76923			cathode mass	2		cathode thickness	0.021978
anode mass (AM)	642.857	0.642857		anode density ( (AM))	2.2			anode volume (only AM)	0.292208			anode mass	0.676692		anode thickness	0.00231911
	a. u.				cm-3
cathode porosity	0.3			electrolyte in pores of cathode	1.18681
anode porosity	0.3			electrolyte in pores of anode	0.125232
	cm-3				g cm-3				g
Electrolyte volume	2.01343			Electrolyte density	1.04			Active electrolyte mass	2.09397
	cm-3
electrolyte stored by separator	0.701383
	a. u.				cm-3				g cm-3
Separator porosity	0.4			Separator volume(+ pores)	1.75346			Separator density	0.92			Separator volume(without pores)	1.05208
	g				cm-1	um
Separator mass	1.61318			Separator thickness (each layer)	0.00974144	97.4144
	g cm-3				um	cm			cm-3				g
Current collector density	2.7			Current collector thickness (each layer)	18	0.0018		Current collector volume	0.342			Current collector mass	0.9234
	um	cm			g cm-3				cm-3
package thickness	250	0.025		package density	2			top+bottle pouch volume	0.5
	um	cm			cm-3				cm-3				g
height of pouch	6968.94	0.696894		side pouch volume	0.220377			pouch volume	0.720377			pouch mass	1.44075
	g		%		mL		%
cathode mass	2	0.228624	22.8624	cathode volume (AM)	2.76923	0.385187	38.5187					20.5573
anode mass	0.676692	0.0773539	7.73539	anode volume (AM)	0.292208	0.0406447	4.06447					16.8945
Electrolyte mass	2.09397	0.239365	23.9365	Electrolyte volume	2.01343	0.280058	28.0058
Separator mass	1.61318	0.184406	18.4406	Separator volume	1.05208	0.146339	14.6339
Current collector mass	0.9234	0.105556	10.5556	Current collector volume	0.342	0.0475706	4.75706
pouch mass	1.44075	0.164695	16.4695	pouch volume	0.720377	0.100201	10.0201
sum	8.74799		0	sum	7.18932		0
reduction factor	3.58105		0				0
